# Supplementary material for: The Structural Rule Distinguishing a Superfold: A Case Study of Ferredoxin Fold and the Reverse Ferredoxin Fold
Source: MDPI journal article supplement (doi:10.3390/molecules27113547), 2022-05-31
Supplement: s1 [file s1]

Supplementary Materials for  
The structural rule distinguishing a superfold: A case study  
of ferredoxin-like fold and the reverse ferredoxin-like fold

Takumi Nishina, Megumi Nakajima, Masaki Sasai and George Chikenji

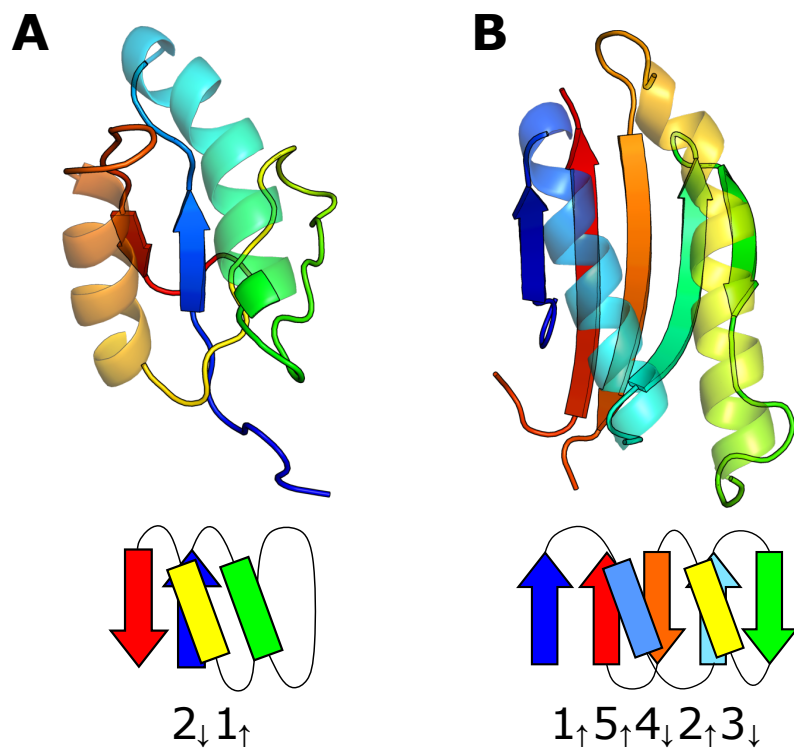

**Figure S1:** Examples of protein structures whose topology cannot be classified in terms of X-groups in ECOD. **(A)** Tetracycline resistance protein, tetM (PDB ID: 3J25), which belongs to the X-group representing the ferredoxin fold, but STRIDE identifies only two  $\beta$ -strands in tetM. **(B)** S-layer protein (PDB ID: 3CVZ), which belongs to the X-group representing the reverse ferredoxin fold, but STRIDE identifies a topology  $1_{\uparrow} 5_{\uparrow} 4_{\downarrow} 2_{\uparrow} 3_{\downarrow}$  for this protein.

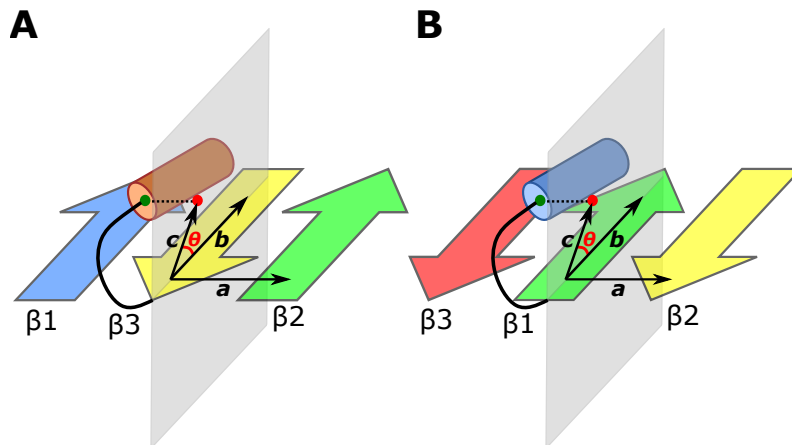

**Figure S2:** Definition of the angle  $\theta$  to locate the position of the terminal  $\alpha$ -helix in the  $1_{\uparrow}3_{\downarrow}2_{\uparrow} + \text{C-term } \alpha$  structure and the  $3_{\downarrow}1_{\uparrow}2_{\downarrow} + \text{N-term } \alpha$  structure. When  $\theta > 0$ , the terminal helix and the helix in the  $\beta\alpha\beta$  structure lie on the same side of the  $\beta$ -sheet plane, while these helices lie on the opposite side of the plane when  $\theta < 0$ . We defined three vectors,  $\mathbf{a}$ ,  $\mathbf{b}$ , and  $\mathbf{c}$ , and defined  $\theta$  as the angle between  $\mathbf{b}$  and  $\mathbf{c}$ . **(A)** In the  $1_{\uparrow}3_{\downarrow}2_{\uparrow} + \text{C-term } \alpha$  structure, the vector  $\mathbf{a}$  is a vector extending from the  $\text{C}\alpha$  atom of the C-terminal residue of the  $\beta$ -strand 3 (yellow arrow) to the  $\text{C}\alpha$  atom of the N-terminal residue of the  $\beta$ -strand 2 (green arrow). The vector  $\mathbf{b}$  is a vector extending from the  $\text{C}\alpha$  atom of the C-terminal residue of the  $\beta$ -strand 3 to the  $\text{C}\alpha$  atom of the second residue before the C-terminal residue of the  $\beta$ -strand 3. We projected the center of mass (green dot) of  $\text{C}\alpha$  atoms of four N-terminal residues of the  $\alpha$ -helix (orange cylinder) onto the plane spanned by  $\mathbf{b}$  and  $\mathbf{a} \times \mathbf{b}$  (red dot). The vector  $\mathbf{c}$  is a vector extending from the  $\text{C}\alpha$  atom of the C-terminal residue of the  $\beta$ -strand 3 to the projected point. **(B)** In the  $3_{\downarrow}1_{\uparrow}2_{\downarrow} + \text{N-term } \alpha$  structure, the vector  $\mathbf{a}$  is a vector extending from the  $\text{C}\alpha$  atom of the N-terminal residue of the  $\beta$ -strand 1 (green arrow) to the  $\text{C}\alpha$  atom of the C-terminal residue of the  $\beta$ -strand 2 (yellow arrow). The vector  $\mathbf{b}$  is a vector extending from the  $\text{C}\alpha$  atom of the N-terminal residue of the  $\beta$ -strand 1 to the  $\text{C}\alpha$  atom of the second residue after the N-terminal residue of the  $\beta$ -strand 1. We projected the center of mass (green dot) of  $\text{C}\alpha$  atoms of four C-terminal residues of the  $\alpha$ -helix (blue cylinder) onto the plane spanned by  $\mathbf{b}$  and  $\mathbf{a} \times \mathbf{b}$  (red dot). The vector  $\mathbf{c}$  is a vector extending from the  $\text{C}\alpha$  atom of the C-terminal residue of the  $\beta$ -strand 3 to the projected point.

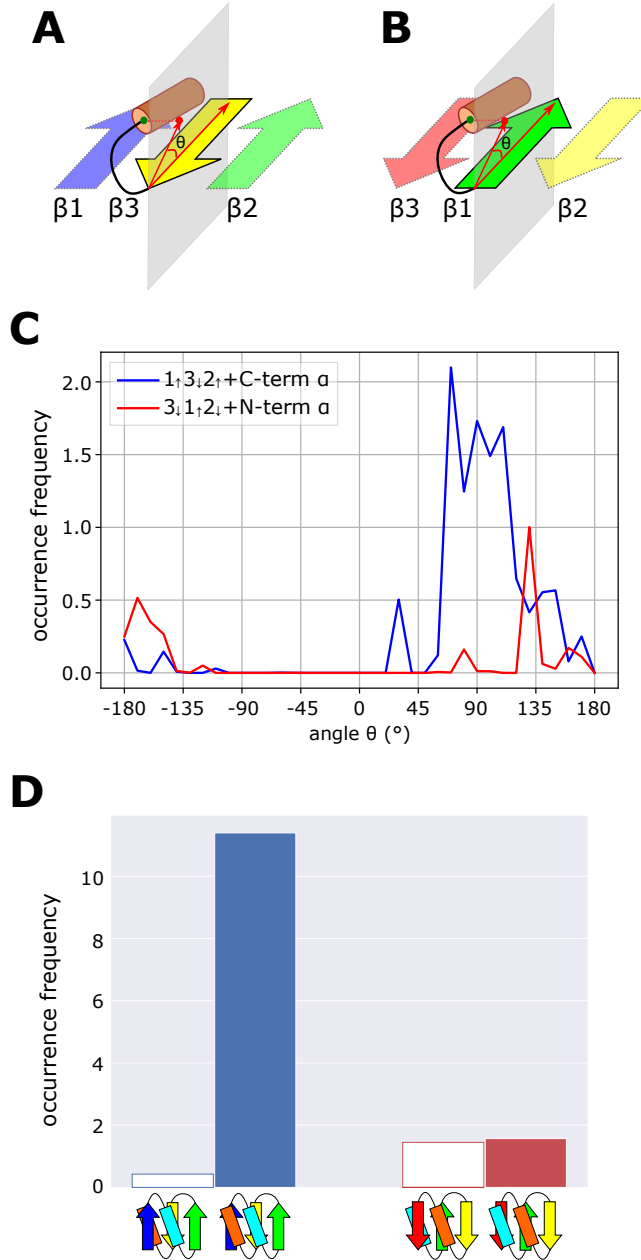

**Figure S3:** Occurrence frequency of  $\theta$  in the dataset.  $\theta$  is predominantly positive in  $1\uparrow 3\downarrow 2\uparrow + \text{C-term } \alpha$ , while the occurrence frequency for  $\theta < 0$  is small both in  $1\uparrow 3\downarrow 2\uparrow + \text{C-term } \alpha$  and  $3\downarrow 1\uparrow 2\downarrow + \text{N-term } \alpha$ . Therefore, the structure with  $\theta > 0$  should explain the major difference between  $1\uparrow 3\downarrow 2\uparrow + \text{C-term } \alpha$  and  $3\downarrow 1\uparrow 2\downarrow + \text{N-term } \alpha$ . **(A)**  $\theta$  in the  $1\uparrow 3\downarrow 2\uparrow + \text{C-term } \alpha$  structure. **(B)**  $\theta$  in the  $3\downarrow 1\uparrow 2\downarrow + \text{N-term } \alpha$  structure. **(C)** Occurrence frequency of  $\theta$  in the  $1\uparrow 3\downarrow 2\uparrow + \text{C-term } \alpha$  (blue) and  $3\downarrow 1\uparrow 2\downarrow + \text{N-term } \alpha$  (red) structures. The terminal helix and the helix in the  $\beta\alpha\beta$  structure are on the same side of the  $\beta$ -sheet plane when  $\theta > 0$ , while they are on the opposite side when  $\theta < 0$ . The 99% sequence identity representatives derived from the ECOD database was used for this analysis. **(D)** Occurrence frequencies of helices being on the opposite versus the same side of the  $1\uparrow 3\downarrow 2\uparrow + \text{C-term } \alpha$  (Left) and  $3\downarrow 1\uparrow 2\downarrow + \text{N-term } \alpha$  structure (Right). A white bar surrounded by blue lines, a blue bar, a white bar surrounded by red lines, and a red bar represent occurrence frequencies of the  $1\uparrow 3\downarrow 2\uparrow + \text{C-term } \alpha$  structures with helices being on opposite side ( $\theta < 0$ ), those with helices being on the same side ( $\theta > 0$ ), the  $3\downarrow 1\uparrow 2\downarrow + \text{N-term } \alpha$  structures with helices being on the opposite side ( $\theta < 0$ ), and those with helices being on the same side ( $\theta > 0$ ), respectively.

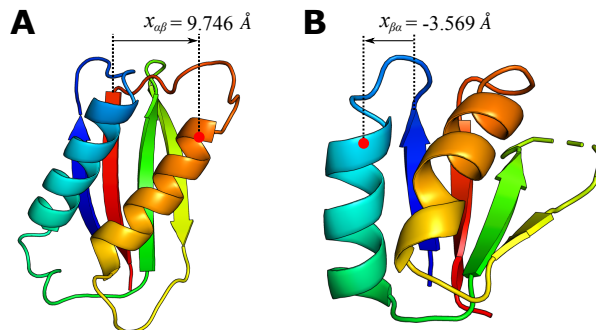

**Figure S4:** Examples of proteins with the reverse ferredoxin fold showing uncommon  $\alpha\beta$ - or  $\beta\alpha$ -configuration. (A) The catalytic core of human DNA polymerase kappa (PDB ID: 1T94) has a long  $\alpha\beta$ -loop showing the large  $x_{\alpha\beta}$ . (B) D-alanine-D-alanine ligase from a bacterium (PDB ID: 4EG0) shows  $x_{\beta\alpha} < 0$

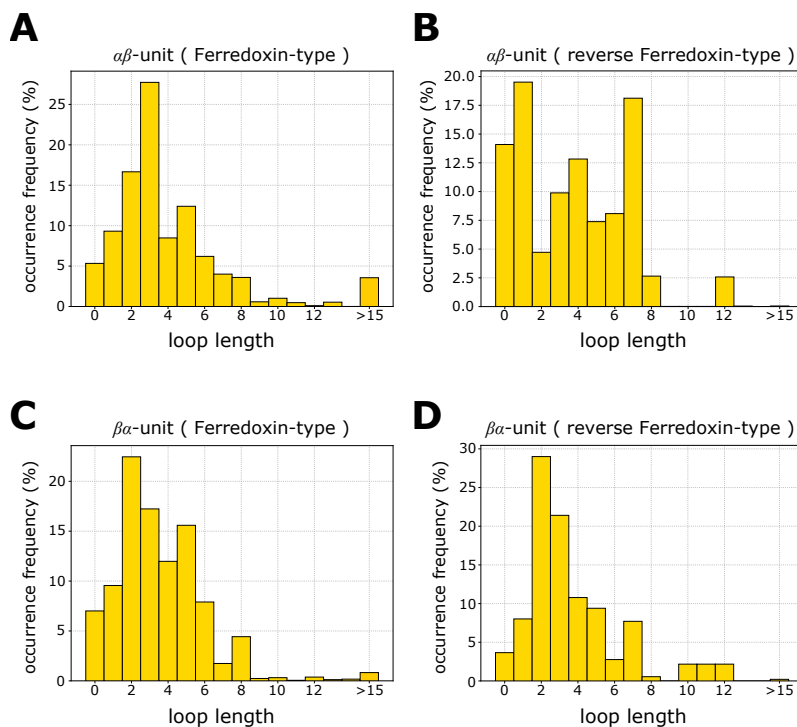

**Figure S5:** Distributions of loop length in the  $\alpha\beta$ -unit or  $\beta\alpha$ -unit. The loop length is defined by the number of residues constituting the loop. (A) The distribution of the loop in the  $\alpha\beta$ -unit in the ferredoxin fold. (B) The distribution of the loop in the  $\alpha\beta$ -unit in the reverse ferredoxin fold. (C) The distribution of the loop in the  $\beta\alpha$ -unit in the ferredoxin fold. (D) The distribution of the loop in the  $\beta\alpha$ -unit in the reverse ferredoxin fold.
